# Supplementary material
Source: HighWire-hosted journal article supplement (http://jpet.aspetjournals.org/highwire/filestream/147222/field_highwire_adjunct_files/0/264069SupplDataAll.pdf)
Supplement: 264069SupplDataAll.pdf [file 264069SupplDataAll.pdf]

Marek & Salek Extending the specificity of differential-reinforcement-of-low rate 72-s (DRL 72-s) behavior for screening antidepressant-like effects of glutamatergic clinically validated anxiolytic or antidepressant drugs in rats. J Pharmacol Exp Ther. Supplemental Fig. 1.

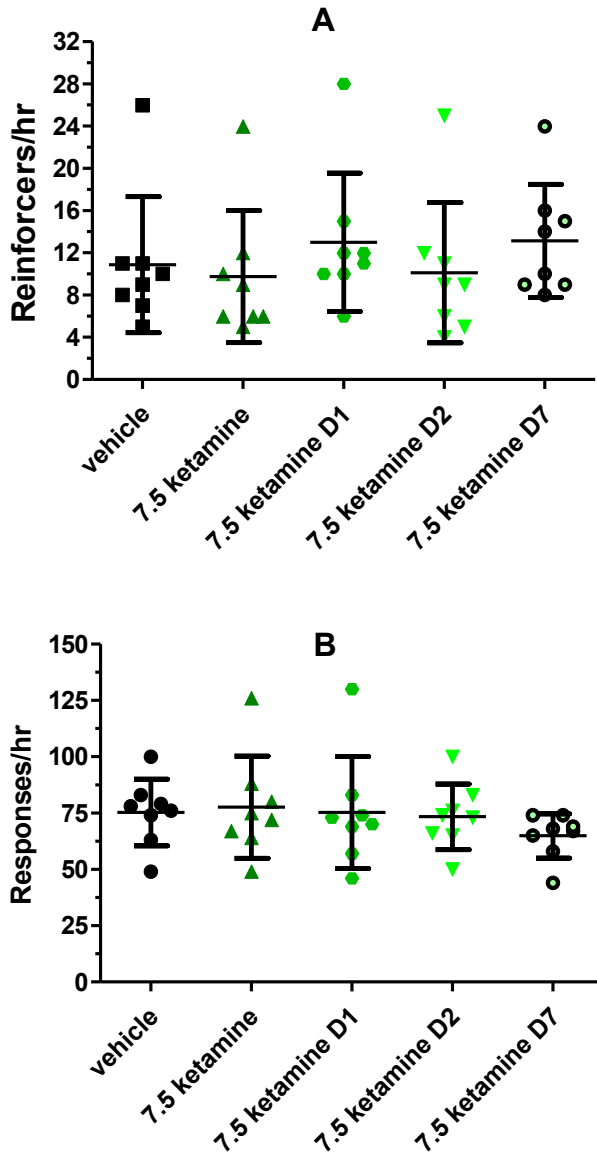

Supplemental Fig 1. Ketamine time course for 7.5 mg dose compared to vehicle on DRL 72-s behavior. The “7.5 ketamine” label reflects the 7.5 mg ketamine data displayed in Fig 5 of the manuscript. The D1, D2 and D7 data refer to reinforcers and total responses during the 60 min behavioral session 1, 2, and 7 days following the ketamine dose with the session conducted 1 h following drug administration. The same symbols are used for the vehicle and ketamine (day of administration) from Fig. 5 of the manuscript. The data 1,2, and 7 days following the 7.5 mg ketamine injection are displayed by green circles, green inverted triangles and green circles with a black surrounding line.

Marek & Salek Extending the specificity of differential-reinforcement-of-low rate 72-s (DRL 72-s) behavior for screening antidepressant-like effects of glutamatergic clinically validated anxiolytic or antidepressant drugs in rats. *J Pharmacol Exp Ther.* Supplemental Fig. 2.

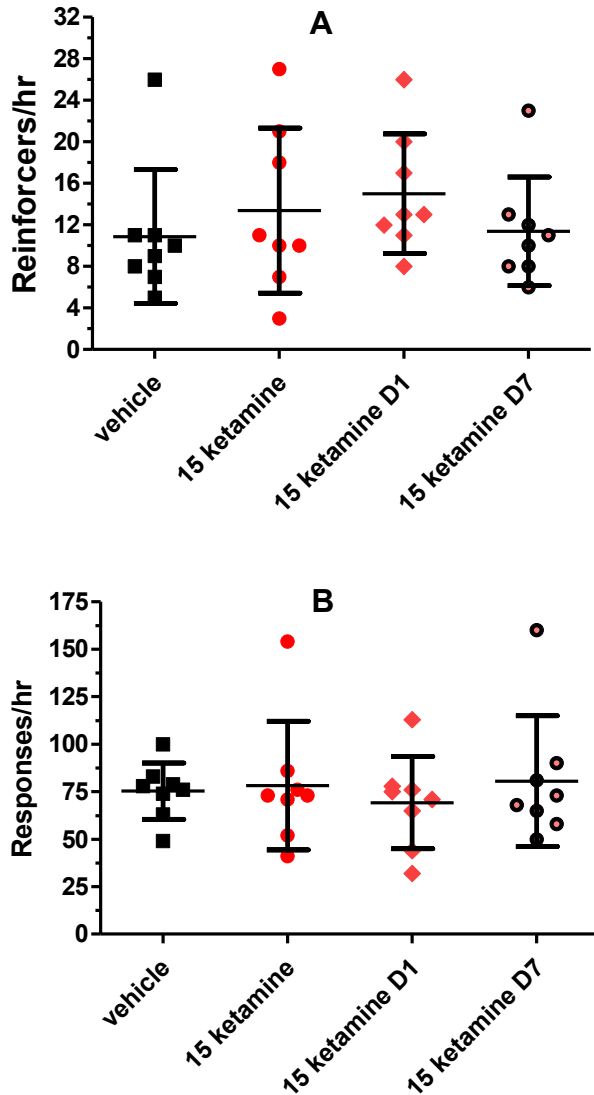

Supplemental Fig 2. Ketamine time course for 15 mg dose compared to vehicle on DRL 72-s behavior. The “15 ketamine” label reflects the 15 mg ketamine data displayed in Fig 5 of the manuscript. The D1 and D7 data refer to reinforcers and total responses during the 60 min behavioral session 1 and 7 days following the ketamine dose with the session conducted 1 h following drug administration. The same symbols are used for the vehicle and ketamine (day of administration) from Fig. 5 of the manuscript. The data 1 and 7 days following the 15 mg ketamine injection are displayed by red diamonds and red circles with a black surrounding line.

Marek & Salek Extending the specificity of differential-reinforcement-of-low rate 72-s (DRL 72-s) behavior for screening antidepressant-like effects of glutamatergic clinically validated anxiolytic or antidepressant drugs in rats. J Pharmacol Exp Ther

Supplemental Table 1. Effects of LY354740, mGluR2 PAMs, mGlu2/3 receptor antagonists, and ketamine on Major Depressive Disorder (MDD) clinical trials, preclinical antidepressant screens, Generalized Anxiety Disorders (GAD) clinical trials, and preclinical anxiolytic drug screens.

|                                | LY354740<br>(mGlu2/3<br>agonist)    | mGlu2<br>receptor PAMs                 | mGlu2/3<br>receptor<br>antagonists     | Ketamine or<br>Esketamine               |
|--------------------------------|-------------------------------------|----------------------------------------|----------------------------------------|-----------------------------------------|
| <b>MDD clinical trials</b>     | <i>not tested</i>                   | <b>Negative</b> <sup>1</sup>           | <b>Negative</b> <sup>2</sup>           | <b>POSITIVE</b> <sup>3-8</sup>          |
| DRL 72-s behavior              | Negative <sup>9</sup>               | <b>Positive</b> <sup>10,11</sup>       | Negative <sup>12</sup>                 | <b>Positive</b> <sup>9,13,14</sup>      |
| Forced swim test               | Negative <sup>15,16,21</sup>        | <b>Positive</b> <sup>10</sup>          | <b>Positive</b> <sup>12,18,20-21</sup> | <b>Positive</b> <sup>20, 22-24,37</sup> |
| Tail suspension test           | Negative <sup>15</sup>              | <i>not tested</i>                      | <b>Positive</b> <sup>17,20,25</sup>    | <b>Positive</b> <sup>20</sup>           |
| Olfactory<br>bulbectomy        | <i>not tested</i>                   | <i>not tested</i>                      | <b>Positive</b> <sup>25</sup>          | <b>Positive</b> <sup>26</sup>           |
| <b>GAD clinical trials</b>     | <b>POSITIVE</b> <sup>27,28</sup>    | <i>not tested</i>                      | <i>not tested</i>                      | <i>not tested</i>                       |
| Elevated plus maze             | <b>Positive</b> <sup>29-31,43</sup> | <b>Positive</b> <sup>32</sup>          | Negative <sup>17,12</sup>              | <b>Pos/neg</b> <sup>33-39</sup>         |
| Stress-induced<br>hyperthermia | <b>Positive</b> <sup>40,41</sup>    | <b>Positive</b> <sup>41,10,47,50</sup> | <b>Pos/neg</b> <sup>12,42</sup>        | <i>not tested</i>                       |
| Lactate-induced<br>panic       | <b>Positive</b> <sup>43</sup>       | <b>Positive</b> <sup>44</sup>          | <i>not tested</i>                      | <i>not tested</i>                       |
| Fear potentiated<br>startle    | <b>Positive</b> <sup>30,48</sup>    | <b>Positive</b> <sup>49,50</sup>       | <b>Pos/Neg</b> <sup>46,49</sup>        | <b>Pos/neg</b> <sup>51-54</sup>         |

- 1 (Kent et al., 2016)
- 2 (NCT01457677)
- 3 (Berman et al., 2000)
- 4 (Caddy et al., 2015)
- 5 (Daly et al., 2019)
- 6 (Fedgchin et al., 2019)
- 7 (Niciu et al., 2014)
- 8 (Papova et al., 2019)
- 9 (Marek & Salek, 2020, present manuscript)
- 10 (Fell et al., 2011)
- 11 (Nikiforuk, 2010)
- 12 (Bespalov et al., 2008; Hillhouse and Porter, 2014)
- 13 (Hillhouse and Porter, 2014)
- 14 (Hillhouse et al., 2014)
- 15 (Klodzinska et al., 1999)
- 16 (Witkin et al., 2017)
- 17 (Chaki et al., 2004)
- 18 (Witkin and Eiler, 2006)
- 19
- 20 (Witkin et al., 2016)
- 21 (Karasawa et al., 2005)
- 22 (Garcia et al., 2008)

- 23 (Autry et al., 2011)
- 24 (Salat et al., 2015)
- 25 (Palucha-Poniewiera et al., 2010)
- 26 (Holubova et al., 2016)
- 27 (Dunayevich et al., 2008)
- 28 (Michelson et al., 2005)
- 29 (Monn et al., 1997)
- 30 (Helton et al., 1998)
- 31 (Ferris et al., 2001)
- 32 (Galici et al., 2006)
- 33 (Silvestre et al., 1997)
- 34 (Loss et al., 2012)
- 35 (Kilic et al., 2014)
- 36 (Zhang et al., 2015)
- 37 (Engin et al., 2009)
- 38 (Hayase et al., 2006)
- 39 (Fraga et al., 2018)
- 40 (Spooren et al., 2002)
- 41 (Rorick-Kehn et al., 2006)
- 42 (Iijima et al., 2007)
- 43 (Shekhar and Keim, 2000)
- 44 (Johnson et al., 2013)
- 45 (Linden et al., 2004)
- 46 (Yoshimizu et al., 2006)
- 47 (Wieronska et al., 2012)
- 48 (Tizzano et al., 2002)
- 49 (Johnson et al., 2003)
- 50 (Johnson et al., 2005)
- 51 (Clifton et al., 2018)
- 52 (McGowan et al., 2017)
- 53 (Radford et al., 2018)
- 54 (Pietersen et al., 2006)
